# Supplementary material
Source: PubMed Central journal article supplement (PMC3081789)

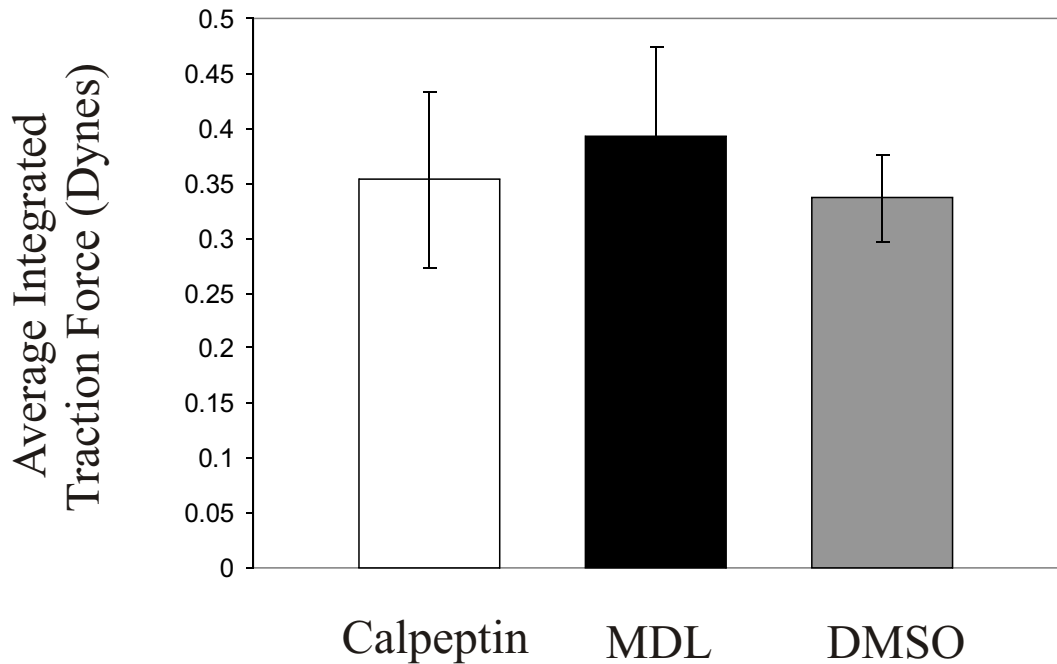

Supplement: NIHMS199320-supplement-Suppl_Fig_1.pdf [file NIHMS199320-supplement-Suppl_Fig_1.pdf]

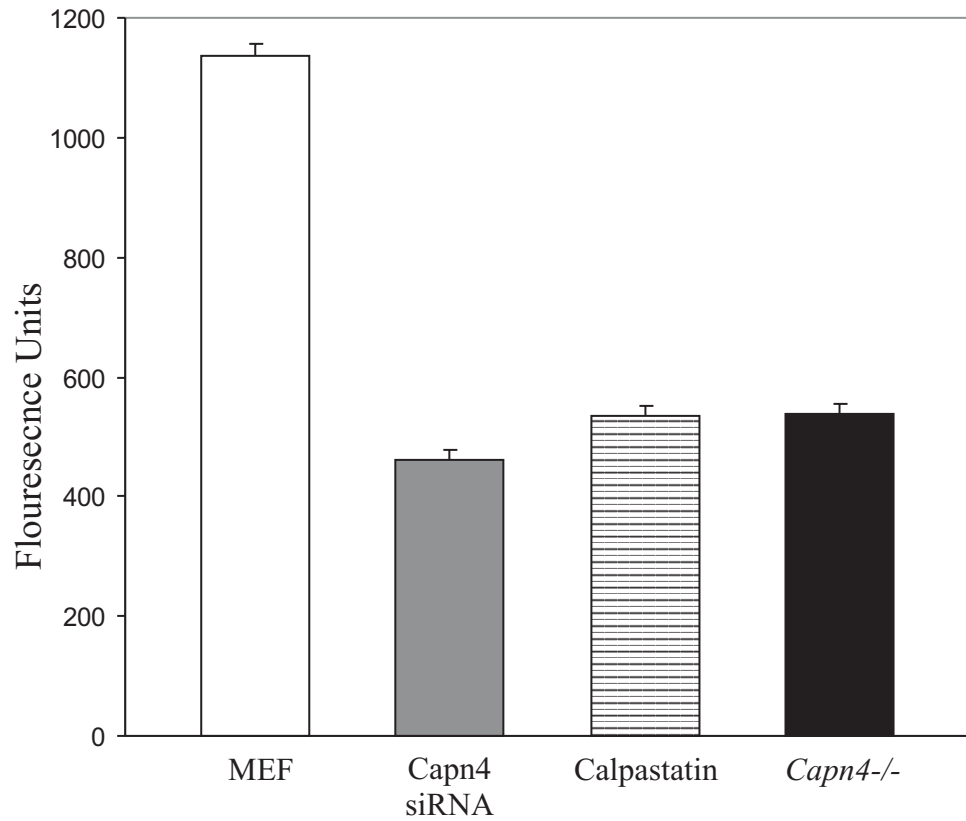

Supplement: NIHMS199320-supplement-Suppl_Fig_2.pdf [file NIHMS199320-supplement-Suppl_Fig_2.pdf]
